# Supplementary material for: The first zwitterionic cocrystal of indomethacin with amino acid showing optimized physicochemical properties as well as accelerated absorption and slowed elimination in vivo
Source: Royal Society of Chemistry journal article supplement (doi:10.1039/c9nj06180k), 2020-01-01
Supplement: c9nj06180k1.pdf [file c9nj06180k1.pdf]

## Supplementary Information

### **The first zwitterionic cocrystal of indomethacin with amino acid showing optimized physicochemical properties as well as accelerated absorption and slowed elimination *in vivo***

Ling-Yang Wang<sup>a</sup>, Yue-Ming Yu<sup>a</sup>, Fu-Bin Jiang<sup>c</sup>, Yan-Tuan Li<sup>a,b,\*</sup>, Zhi-Yong Wu<sup>a</sup>, Cui-Wei Yan\*

<sup>a</sup> *School of Medicine and Pharmacy and College of Marine Life Science, Ocean University of China, Qingdao, Shandong 266003, PR China.*

<sup>b</sup> *Laboratory for Marine Drugs and Bioproducts, Qingdao National Laboratory for Marine Science.*

<sup>c</sup> *Department of Chemistry, Beijing Normal University, Beijing 100875, PR China.*

\* Correspondence to: Yan-Tuan Li and Cui-Wei Yan (Telephone: +86-53282031695).

E-mail addresses: yantuanli@ouc.edu.cn (Yan-Tuan Li), cuiweiyan@ouc.edu.cn (Cui-Wei Yan).

## **Contents**

**Fig. S1.** FT-IR spectra of INC-PL-H<sub>2</sub>O compared with its starting materials.

**Fig. S2.** DSC and TGA profiles of cocrystal INC-PL-H<sub>2</sub>O.

**Fig. S3.** XRPD comparison of simulated pattern for INC-PL-H<sub>2</sub>O and the residual solids after the powder dissolution measurements.

**Fig. S4.** IDR profiles of INC, PL and INC-PL-H<sub>2</sub>O.

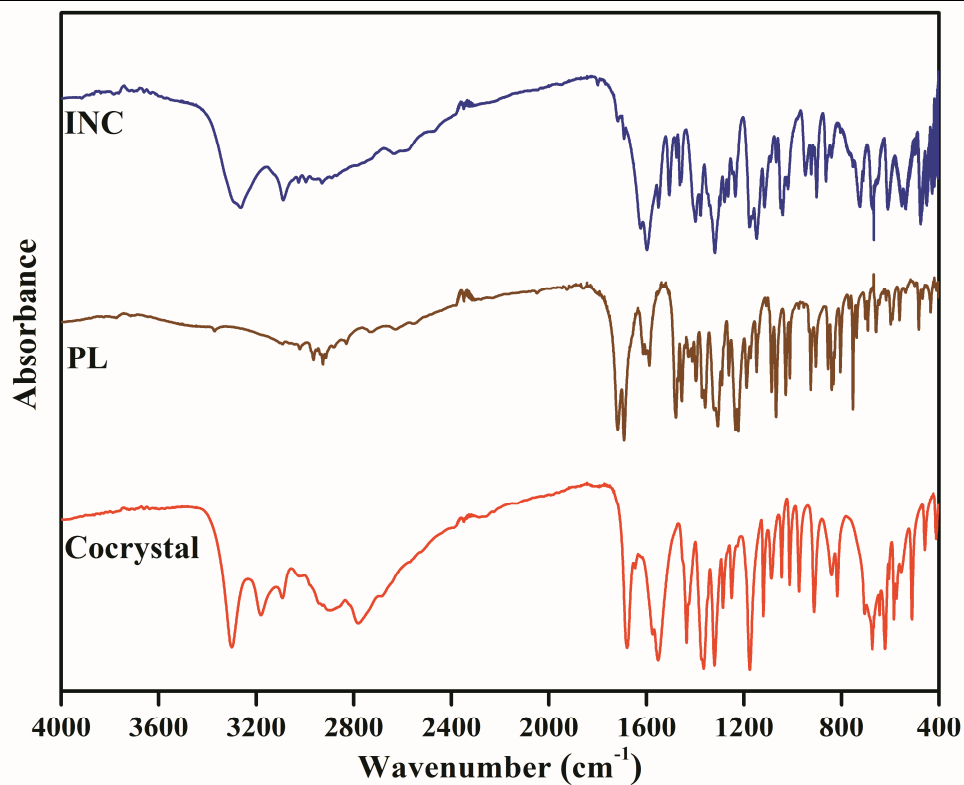

Fig. S1. FT-IR spectra of (a) INC, (b) PL, and (c) INC-PL-H<sub>2</sub>O.

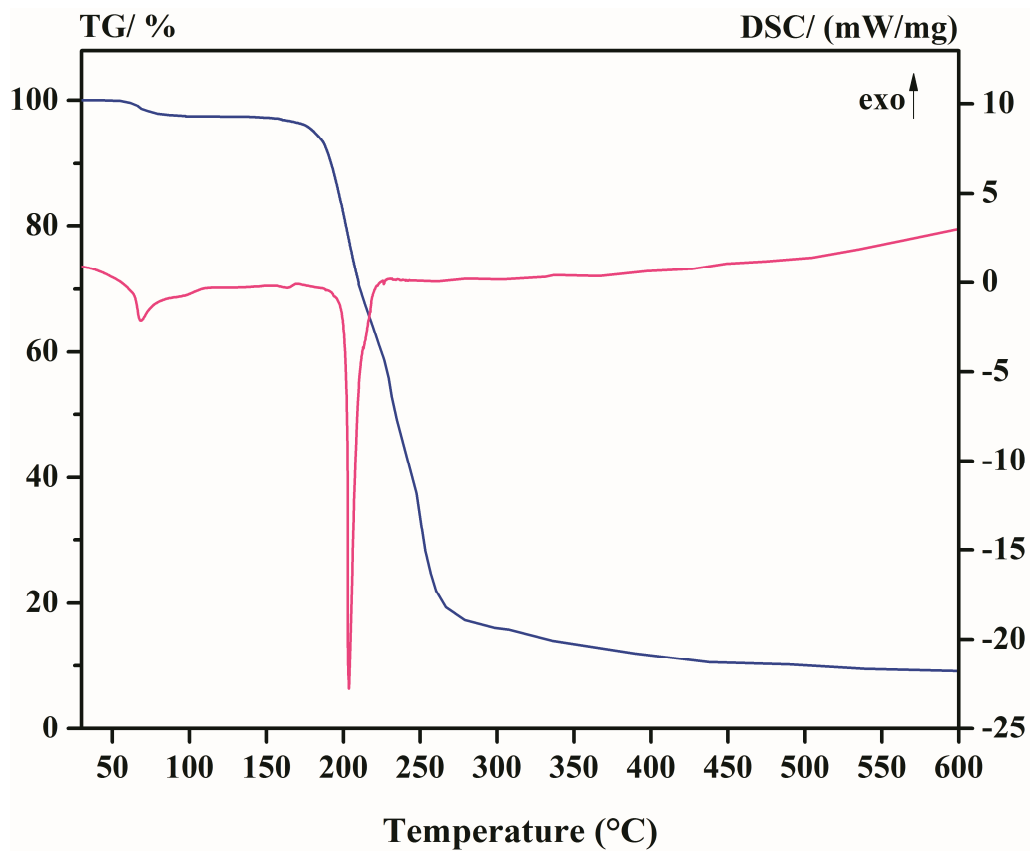

Fig. S2. DSC (blue line) and TGA (red line) profiles of INC-PL-H<sub>2</sub>O.

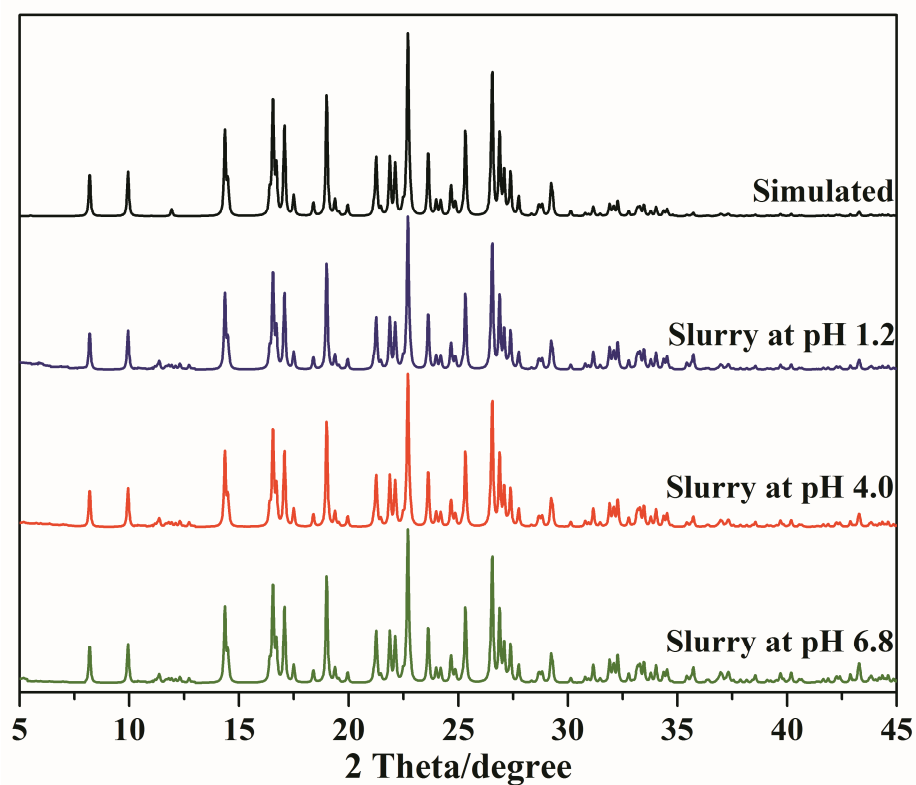

Fig. S3. XRPD comparison of simulated pattern for INC-PL-H<sub>2</sub>O and the residual solids after the powder dissolution measurements

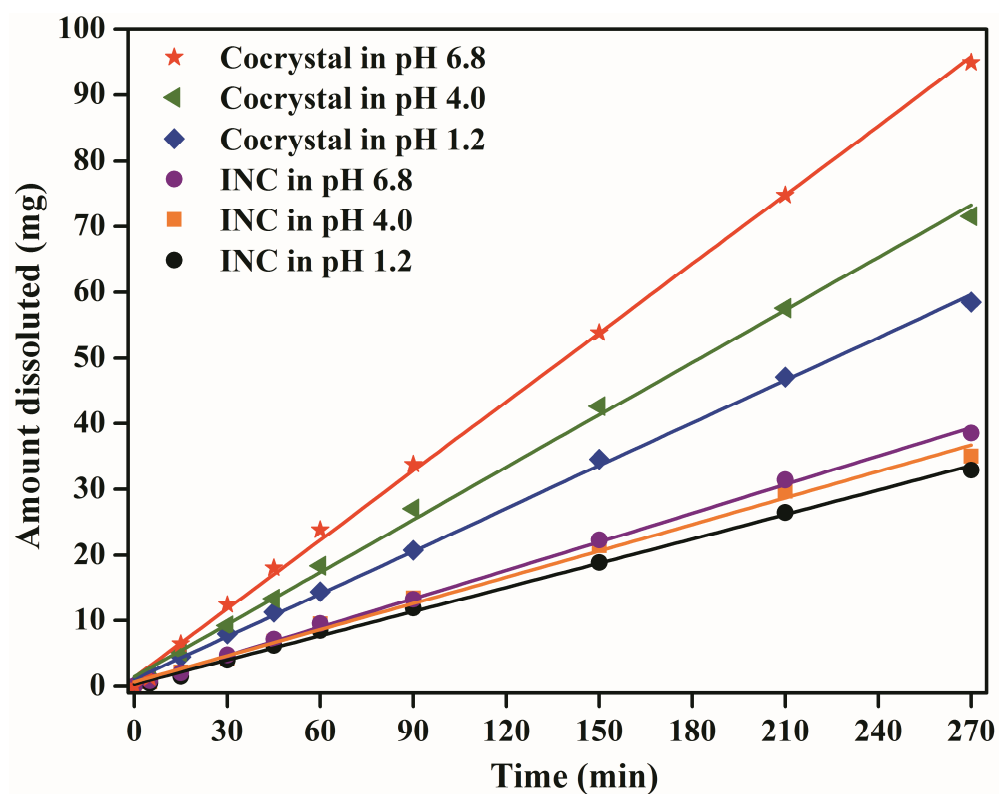

Fig. S4. IDR profiles of INC and INC-PL at pH 1.2, 4.0, and 6.8.
